# Supplementary material
Source: PubMed Central journal article supplement (PMC4157638)
Supplement: NIHMS550328-supplement-Chemical_compound_structures.pdf [file NIHMS550328-supplement-Chemical_compound_structures.pdf]

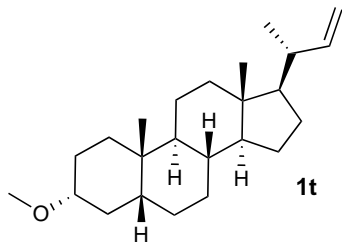

3 $\alpha$ -Methyl-24-nor-5 $\beta$ -chol-22-ene

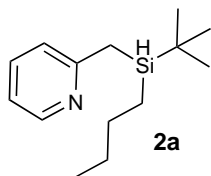

2-((*tert*-Butyl(butyl)silyl)methyl)pyridine

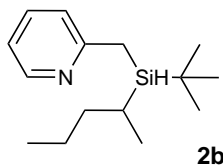

2-((*sec*-Butyl(*tert*-butyl)silyl)methyl)pyridine

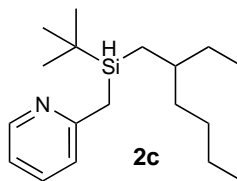

2-((*tert*-Butyl(2-ethylhexyl)silyl)methyl)pyridine

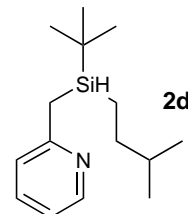

2-((*tert*-Butyl(isopentyl)silyl)methyl)pyridine

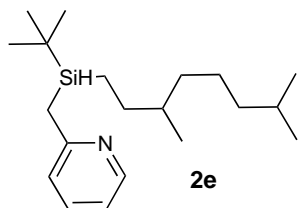

2-((*tert*-Butyl(3,7-dimethyloctyl)silyl)methyl)pyridine

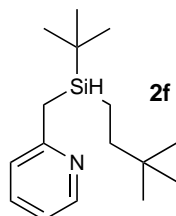

2-((*tert*-Butyl(3,3-dimethylbutyl)silyl)methyl)pyridine

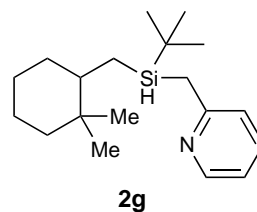

2-((*tert*-Butyl((2,2-dimethylcyclohexyl)methyl)silyl)methyl)pyridine

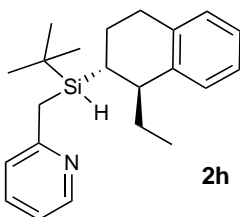

2-((*tert*-Butyl(1-ethyl-1,2,3,4-tetrahydronaphthalen-2-yl)silyl)methyl)pyridine

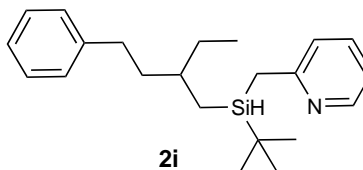

2-((*tert*-Butyl(2-ethyl-4-phenylbutyl)silyl)methyl)pyridine

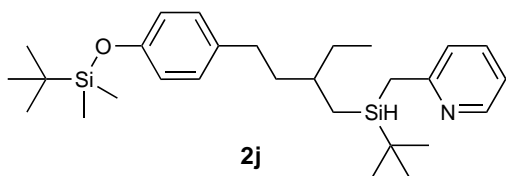

2-((*tert*-Butyl(4-(4-(*tert*-butyl)dimethylsilyloxy)phenyl)-2-ethylbutyl)silyl)methyl)pyridine

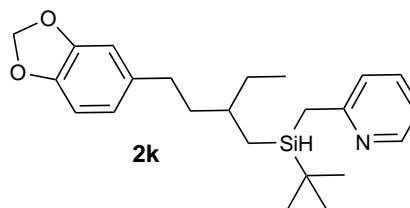

2-(((4-(Benzo[d][1,3]dioxol-5-yl)-2-ethylbutyl)(*tert*-butyl)silyl)methyl)pyridine

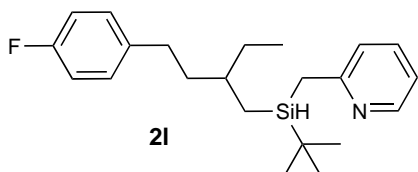

2l

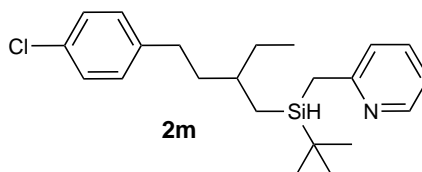

2m

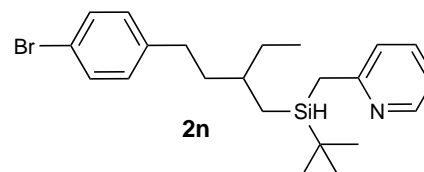

2n

2-((*tert*-Butyl(2-ethyl-4-(4-fluorophenyl)butyl)silyl)methyl)pyridine

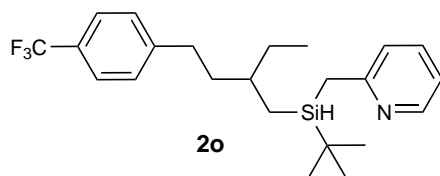

2-((*tert*-Butyl(4-(4-chlorophenyl)-2-ethylbutyl)silyl)methyl)pyridine

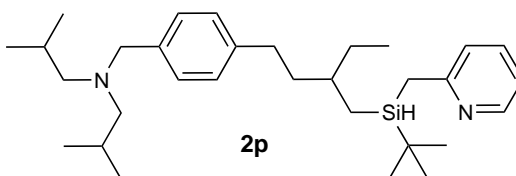

2-(((4-(4-Bromophenyl)-2-ethylbutyl)(*tert*-butyl)silyl)methyl)pyridine

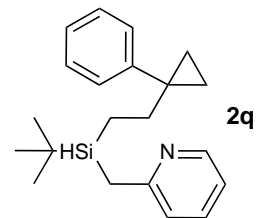

2-((*tert*-Butyl(2-ethyl-4-(4-(trifluoromethyl)phenyl)butyl)silyl)methyl)pyridine

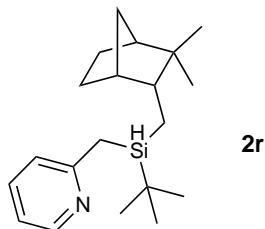

*N*-(4-(3-((*tert*-Butyl(pyridin-2-ylmethyl)silyl)methyl)pentyl)benzyl)-*N*-isobutyl-2-methylpropan-1-amine

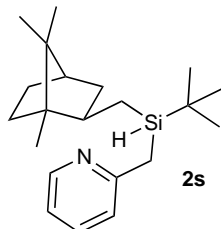

2-((*tert*-Butyl(2-(1-phenylcyclopropyl)ethyl)silyl)methyl)pyridine

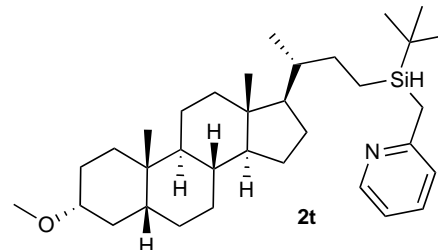

2-((*tert*-Butyl((3,3-dimethylbicyclo[2.2.1]heptan-2-yl)methyl)silyl)methyl)pyridine

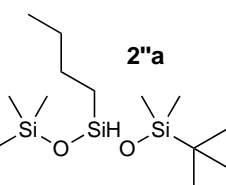

2-((*tert*-Butyl((1,7,7-trimethylbicyclo[2.2.1]heptan-2-yl)methyl)silyl)methyl)pyridine

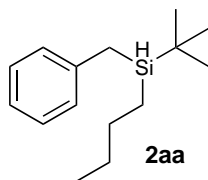

2-((*tert*-Butyl((*R*)-3-((3*R*,5*R*,8*R*,9*S*,10*S*,13*R*,14*S*,17*R*)-3-methoxy-10,13-dimethylhexadecahydro-1*H*-cyclopenta[*a*]phenanthren-17-yl)butyl)silyl)methyl)pyridine

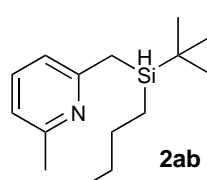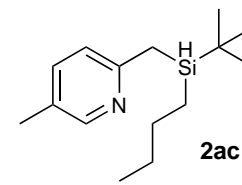

1,5-di-*tert*-Butyl-3-butyl-1,1,5,5-tetramethyltrisiloxane

Benzyl(*tert*-butyl)(butyl)silane

2-((*tert*-Butyl(butyl)silyl)methyl)-6-methylpyridine

2-((*tert*-Butyl(butyl)silyl)methyl)-4-methylpyridine

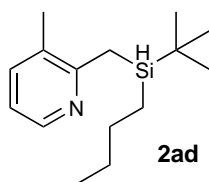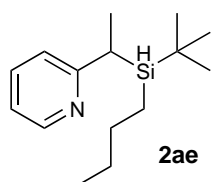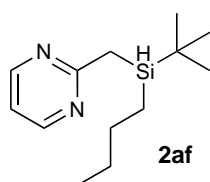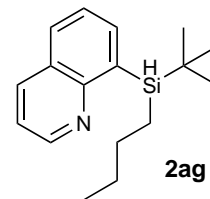

2-((*tert*-Butyl(butyl)silyl)methyl)-3-methylpyridine

2-(1-(*tert*-Butyl(butyl)silyl)ethyl)pyridine

2-((*tert*-Butyl(butyl)silyl)methyl)pyrimidine

8-(*tert*-Butyl(butyl)silyl)quinolone

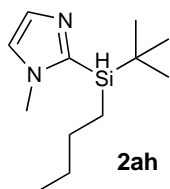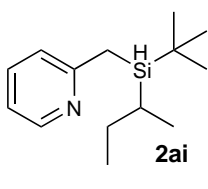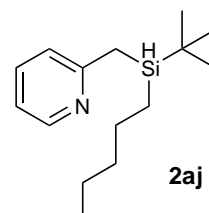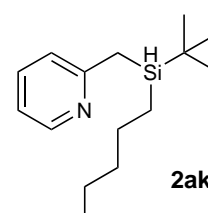

2-((*tert*-Butyl(butyl)silyl)methyl)-1-methyl-1*H*-imidazole

2-((*sec*-Butyl(*tert*-butyl)silyl)methyl)pyridine

2-((*tert*-Butyl(pentyl)silyl)methyl)pyridine

2-((*tert*-Butyl(hexyl)silyl)methyl)pyridine

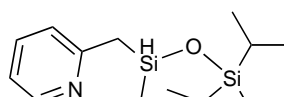

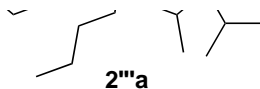

2-[(1-Butyl-3,3,3-triisopropyl disiloxanyl)methyl]pyridine

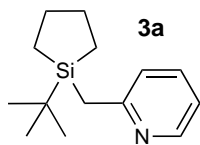

2-((1-*tert*-Butylsilolan-1-yl)methyl)pyridine

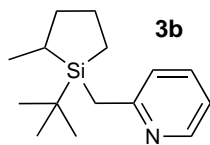

2-((1-*tert*-Butyl-2-methylsilolan-1-yl)methyl)pyridine

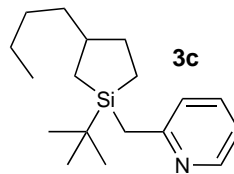

2-((1-*tert*-Butyl-3-butylsilolan-1-yl)methyl)pyridine

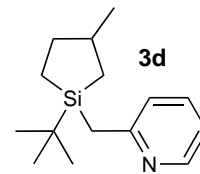

2-((1-*tert*-Butyl-3-methylsilolan-1-yl)methyl)pyridine

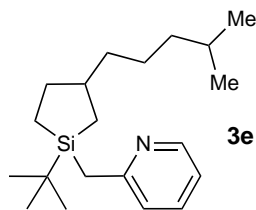

2-((1-*tert*-Butyl-3-(4-methylpentyl)silolan-1-yl)methyl)pyridine

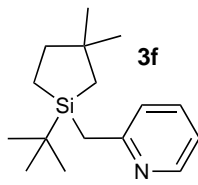

2-((1-*tert*-Butyl-3,3-dimethylsilolan-1-yl)methyl)pyridine

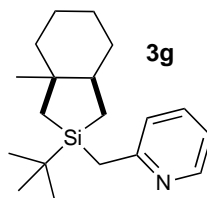

2-((2-*tert*-Butyl-3a-methylocta-hydro-1*H*-benzo[*c*]silol-2-yl)methyl)pyridine

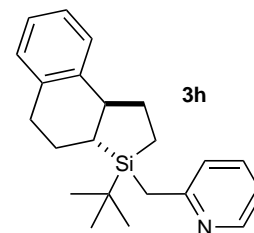

2-(((3*S*,3*aR*,9*bR*)-3-(*tert*-butyl)-2,3,3*a*,4,5,9*b*-hexahydro-1*H*-naphtho[2,1-*b*]silol-3-yl)methyl)pyridine

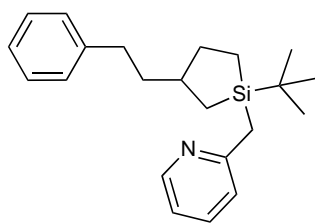

2-((1-*tert*-Butyl-3-phenethylsilolan-1-yl)methyl)pyridine

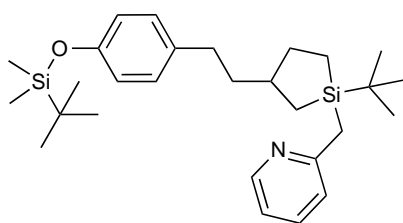

2-((1-*tert*-Butyl-3-(4-(*tert*-butyl)dimethylsilyloxy)phenethyl)silolan-1-yl)methyl)pyridine

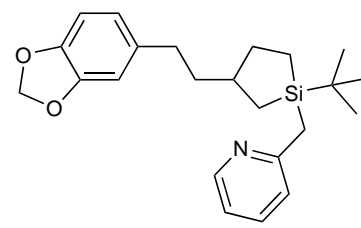

2-((3-(2-(Benzo[*d*][1,3]dioxol-5-yl)ethyl)-1-*tert*-butylsilolan-1-yl)methyl)pyridine

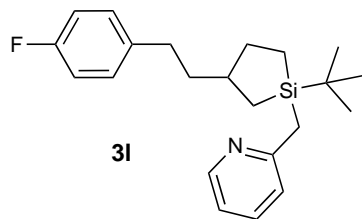

2-((1-*tert*-Butyl-3-(4-fluorophenethyl)silolan-1-yl)methyl)pyridine

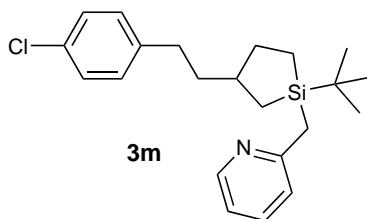

2-((1-*tert*-Butyl-3-(4-chlorophenethyl)silolan-1-yl)methyl)pyridine

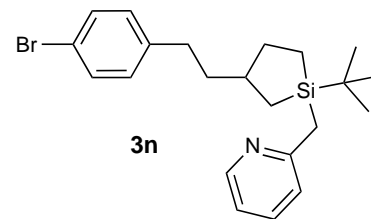

2-((1-*tert*-Butyl-3-(4-bromophenethyl)silolan-1-yl)methyl)pyridine

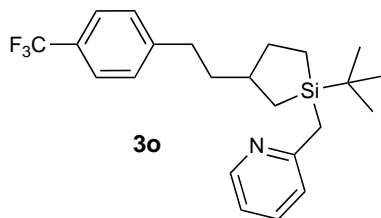

3o

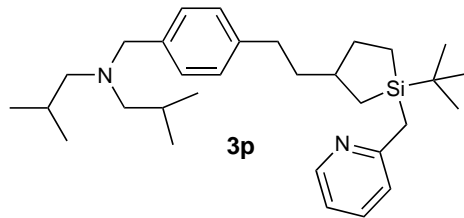

3p

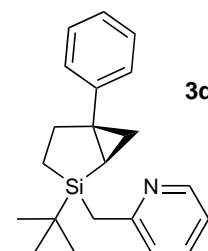

3q

2-((1-*tert*-Butyl-3-(4-trifluoromethyl)silolan-1-yl)methyl)pyridine

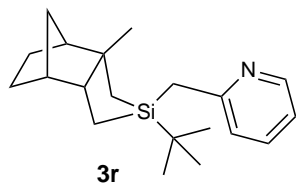

2-[(2-*tert*-Butyl-3a-methyloctahydro-1*H*-4,7-methano-2-benzosilol-2-yl)methyl]pyridine

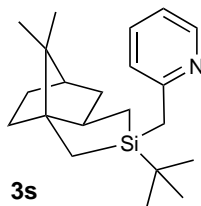

2-[(2-*tert*-Butyl-3a-methyloctahydro-1*H*-4,7-methano-2-benzosilol-2-yl)methyl]pyridine

2-((2-*tert*-Butyl-5-phenyl-2-silabicyclo[3.1.0]hexan-2-yl)methyl)pyridine

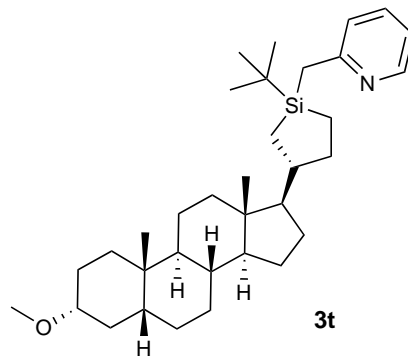

2-(((1*R*,3*R*)-1-*tert*-Butyl-3-((3*R*,5*R*,8*R*,9*S*,10*S*,13*S*,14*S*,17*R*)-3-methoxy-10,13-dimethylhexadecahydro-1*H*-cyclopenta[*a*]phenanthren-17-yl)silolan-1-yl)methyl)pyridine

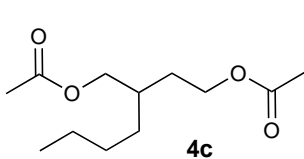

2-Butylbutane-1,4-diyl diacetate

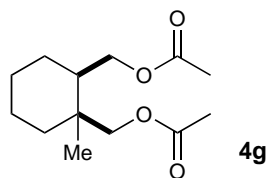

(1-Methylcyclohexane-1,2-diyl) dimethanediyl diacetate

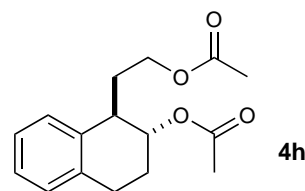

2-(((1*R*(*S*),2*R*(*S*))-2-Acetoxy-1,2,3,4-tetrahydronaphthalen-1-yl) ethyl acetate

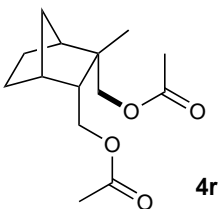

[(1*S*(*R*),2*S*(*R*),3*R*(*S*),4*R*(*S*))-2-methylbicyclo[2.2.1]heptane-2,3-diyl] di(methylene) diacetate

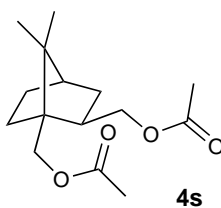

[(1*R*,2*R*,4*R*)-7,7-dimethylbicyclo[2.2.1]heptane-1,2-diyl] di(methylene) diacetate

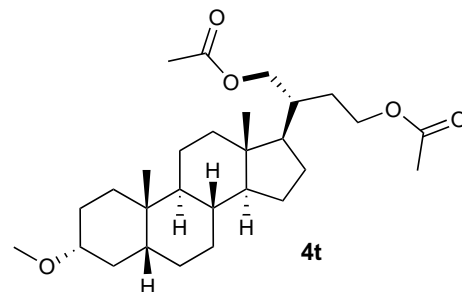

(*R*)-2-((3*R*,5*R*,8*R*,9*S*,10*S*,13*S*,14*S*,17*R*)-3-Methoxy-10,13-dimethylhexadecahydro-1*H*-cyclopenta[*a*]phenanthren-17-yl) butane-1,4-diyl diacetate
